## Index of Authors and Titles

- ALBERCH, P., LEWBART, G. A. *and* GALE, E. A. The fate of larval chondrocytes during the metamorphosis of the epibranchial in the salamander, *Eurycea bislineata* 71
- ANDERSON, G. B. *See* WIEBOLD, J. L.
- ARGENTO, M. P. C. *See* STEFANINI, S.
- BEDDINGTON, R. S. P. The development of 12th to 14th day foetuses following reimplantation of pre- and early-primitive-streak-stage mouse embryos 281
- BULLEIT, R. F. *and* ZIMMERMAN, E. F. The influence of the epithelium on palate shelf reorientation 265
- BURTENSHAW, M. D. *See* GARDNER, R. L.
- COOKE, J. Dynamics of the control of body pattern in the development of *Xenopus laevis*. III. Timing and pattern after u.v. irradiation of the egg and after excision of presumptive head endo-mesoderm 135
- COOKE, J. *and* WEBBER, J. A. Dynamics of the control of body pattern in the development of *Xenopus laevis*. I. Timing and pattern in the development of dorsoanterior and posterior blastomere pairs, isolated at the 4-cell stage 85
- COOKE, J. *and* WEBBER, J. A. Dynamics of the control of body pattern in the development of *Xenopus laevis*. II. Timing and pattern in the development of single blastomeres (presumptive lateral halves) isolated at the 2-cell stage 113
- COPP, A. J. Relationship between timing of posterior neuropore closure and development of spinal neural tube defects in mutant (*curly tail*) and normal mouse embryos in culture 39
- EMANUELSSON, H. Autoradiographic analysis of RNA synthesis in the oocyte-nurse cell complex of the polychaete *Ophryotrocha labronica* 249
- EVANS, E. P. *See* GARDNER, R. L.
- FARRACE, M. G. *See* STEFANINI, S.
- GALE, E. A. *See* ALBERCH, P.
- GARDNER, R. L. Regeneration of endoderm from primitive ectoderm in the mouse embryo: fact or artifact? 303
- GARDNER, R. L., LYON, M. F., EVANS, E. P. *and* BURTENSHAW, M. D. Clonal analysis of X-chromosome inactivation and the origin of the germ line in the mouse embryo 349
- GAUNT, S. J. *In vivo* and *in vitro* cultured mouse preimplantation embryos differ in their display of a teratocarcinoma cell surface antigen: possible binding of an oviduct factor 55
- GILLESPIE, J. I. *See* STERN, C. D.
- GREGG, J. H. *See* KREFFT, M.
- HAMADA, H. *See* SATO, M.
- HAUSEN, P. *See* WINKLBAUER, R.
- HILFER, S. R. *See* VAN DE KAMP, M.
- HOGG, H. *and* MCLAREN, A. Absence of a sex vesicle in meiotic foetal germ cells is consistent with an XY sex chromosome constitution 327
- KASAI, M. *See* SATO, M.
- KOBAYAKAWA, Y. Accumulation of pigment granules around nuclei in early embryos of Anura (Amphibia) 293

- KREFFT, M., VOET, L., GREGG, J. H. *and* WILLIAMS, K. L. Use of a monoclonal antibody recognizing a cell surface determinant to distinguish prestalk and prespore cells of *Dictyostelium discoideum* slugs 15
- LEWBART, G. A. *See* ALBERCH, P.
- LYON, M. F. *See* GARDNER, R. L.
- MANNING, S. *See* STERN, C. D.
- MCLAREN, A. *See* HOGG, H.
- MORRISS-KAY, G. *and* TUCKETT, F. The role of microfilaments in cranial neurulation in rat embryos: effects of short-term exposure to cytochalasin D 333
- MORRISS-KAY, G. *See* TUCKETT, F.
- MURAMATSU, T. *See* SATO, M.
- NAKAMURA, H. *See* NAKANO, K. E.
- NAKANO, K. E. *and* NAKAMURA, H. Origin of the irideal striated muscle in birds 1
- OZAWA, M. *See* SATO, M.
- PONDER, B. A. J. *See* SCHMIDT, G. H.
- SATO, M., OZAWA, M., HAMADA, H., KASAI, M., TOKUNAGA, T. *and* MURAMATSU, T. Cell surface markers to monitor the process of visceral endoderm differentiation from embryonal carcinoma cells: identification of the stage sensitive to high concentration of retinoic acid 165
- SCHMIDT, G. H., WILKINSON, M. M. *and* PONDER, B. A. J. Detection and characterization of spatial pattern in chimaeric tissue 219
- STEFANINI, S., FARRACE, M. G. *and* ARGENTO, M. P. C. Differentiation of liver peroxisomes in the foetal and newborn rat. Cytochemistry of catalase and D-aminoacid oxidase 151
- STERN, C. D., MANNING, S. *and* GILLESPIE, J. I. Fluid transport across the epiblast of the early chick embryo 365
- TOKUNAGA, T. *See* SATO, M.
- TUCKETT, F. *and* MORRISS-KAY, G. M. The ontogenesis of cranial neuromeres in the rat embryo. II. A transmission electron microscope study 231
- TUCKETT, F. *See* MORRISS-KAY, G.
- VAN DE KAMP, M. *and* HILFER, S. R. Cell proliferation in condensing scleral ectomesenchyme associated with the conjunctival papillae in the chick embryo 25
- VOET, L. *See* KREFFT, M.
- WEBBER, J. A. *See* COOKE, J.
- WIEBOLD, J. L. *and* ANDERSON, G. B. Lethality of a tritiated amino acid in early mouse embryos
- WILKINSON, M. M. *See* SCHMIDT, G. H.
- WILLIAMS, K. L. *See* KREFFT, M.
- WINKLBAUER, R. *and* HAUSEN, P. Development of the lateral line system in *Xenopus laevis*. III. Development of the supraorbital system in triploid embryos and larvae 183
- WINKLBAUER, R. *and* HAUSEN, P. Development of the lateral line system in *Xenopus laevis*. IV. Pattern formation in the supraorbital system 193
- ZIMMERMAN, E. F. *See* BULLEIT, R. F.
